# Supplementary material for: Knowledge alone is not enough: Parental factors associated with children's vegetable, fruit, and pulse consumption across three European countries
Source: Research Square preprint supplement (doi:10.21203/rs.3.rs-8016929/v1), 2025-11-20
Supplement: Supplementary file 1 [file 0a9ab98afd2d99780230cc8e.docx]

**Supplements**

Supplementary Table 1. Questions/variables with their response options used in the study and their role in the analysis.

| **Role in the analysis** | **Question/s and answers in the questionnaire** |
| --- | --- |
| **Exposure**  PCA    PCA    PCA    PCA    PCA    PCA    PCA    PCA    PCA    PCA    PCA    PCA    PCA    PCA    PCA    PCA    PCA    PCA    PCA    PCA    PCA    PCA  PCA | **Questions related to parental knowledge**  To what extent do you agree with the following statements? I know what healthy eating is.  Answer options:1= strongly disagree, 2= disagree, 3= neutral, 4= agree, 5= strongly agree  Of the following concepts, which ones do you think are linked to ​​healthy eating? Please, select all options that you consider correct: To eat plenty of fruit and vegetables  Answer options: 0= no, 1= yes  Of the following concepts, which ones do you think are linked to ​​healthy eating? Please, select all options that you consider correct: To eat a wide variety of fruit and vegetables.  Answer options: 0= no, 1= yes  With which frequency do you think the following food groups should/can be consumed based on the nutritional recommendations for the general population? Fruit  Answer options: 0= Avoid intake, 1= once a week, 2= twice a week, 3= 3 times a week, 4= 4 times a week, 5= 5 times a week, 6= 6 times a week, 7= every day.  With which frequency do you think the following food groups should/can be consumed based on the nutritional recommendations for the general population? Vegetables  Answer options:  same as above  With which frequency do you think the following food groups should/can be consumed based on the nutritional recommendations for the general population? Pulses  Answer options:  same as above  How many servings of the following foods do you think should/can be consumed daily? Fruit  Answer options: 0 = Avoid intake, 1 = 1 serving/day, 2 = 2 servings/day, 3= 3 servings/day, 4 = 4 servings/day, 5 = more than 4 servings/day.  How many servings of the following foods do you think should/can be consumed daily? Vegetables  Answer options:  same as above  **Questions related to parental attitudes**  Classify how important the following concepts are to you when planning meals at home, shopping, etc: Rich in vegetables   Answer options: 1= not important at all, 2= not very important, 3= neutral, 4= somewhat important, 5= very important  Classify how important the following concepts are to you when planning meals at home, shopping, etc: Healthy  Answer options:  same as above  To what extent do you agree with the following statements: I would like to change my diet to make it healthier.  Answer options: 1= strongly disagree, 2= disagree, 3= neutral, 4= agree, 5= strongly agree  To what extent do you agree with the following statements: I would like to eat more fruit and vegetables.   Answer options:  same as above  What prevents you from eating healthier and more sustainable right now? Please, select all options that you consider correct: No interest in eating healthier  Answer options: 0= no, 1= yes  To what extent would you like to receive information about these topics? Dietary guidelines (food intake frequency, what to eat/avoid, etc.)  Answer options: 1= not at all, 2= not really, 3= neutral, 4= somewhat, 5= very much  To what extent would you like to receive information about these topics? Impact of food on health  Answer options: same as above    **Questions related to Parental behaviour**  How many days a week do you usually consume a serving of the following food groups? fruit  Answer options: 0= avoid intake, 1= 1 day/week, 2= 2 days/week, 3= 3 days/week, 4= 4 days/week, 5= 5 days/week, 6= 6 days/week, 7= every day.  How many days a week do you usually consume a serving of the following food groups? Vegetables  Answer options: same as above  How many days a week do you usually consume a serving of the following food groups? Pulses  Answer options: same as above  How many servings of the following foods do you usually consume daily? Fruit  Answer options: 0 = Avoid intake, 1 = 1 serving/day, 2 = 2 servings/day, 3= 3 servings/day, 4 = 4 servings/day, 5 = more than 4 servings/day.  How many servings of the following foods do you usually consume daily? Vegetables  Answer options: same as above  Indicate to what extent you include the following foods at snacking times: Fruit  Answer options: 1= never, 2= rarely, 3= sometimes, 4= often, 5= always  Indicate to what extent you include the following foods at snacking times: Vegetable drinks  Answer options: same as above  To what extent do you agree with the following statements? I deliberately consume fruit or vegetables to be a good example for my child(ren) to follow.  Answer options: 1= strongly disagree, 2= disagree, 3= neutral, 4= agree, 5= strongly agree  **Questions related to children’s intake of vegetables, fruit and pulses**  Q: How many days per week does your child usually eat a serving of the following food categories? : Fruit  Answer options: 0= avoid intake, 1= 1 day/week, 2= 2 days/week, 3= 3 days/week, 4= 4 days/week, 5= 5 days/week, 6= 6 days/week, 7= every day.    Q: How many days per week does your child usually eat a serving of the following food categories? : Vegetables  Answers options: Same as above    Q: How many days per week does your child usually eat a serving of the following food categories? : Pulses  Answers options: Same as above  Q: How many servings of the following foods does your child usually eat on a daily basis? :  Fruit  Answer options: 0 = Avoid intake, 1 = 1 serving/day, 2 = 2 servings/day, 3= 3 servings/day, 4 = 4 servings/day, 5 = more than 4 servings/day.  Q: How many servings of the following foods does your child usually eat on a daily basis?: Vegetables  Answer options: same as above. |
| **Outcome**  Combined with total servings per day of fruits, to be used as an outcome in regression analysis  Combined with total servings per day of vegetables, to be used as an outcome in regression analysis    Used as an outcome in regression analysis  Combined with days per week consumption of fruit, to be used as outcome in regression analysis.  Combined with days per week consumption of vegetables, to be used as outcome in regression analysis. |
